# Supplementary material for: Associations of serum betaine with blood pressure and hypertension incidence in middle-aged and older adults: a prospective cohort study
Source: Royal Society of Chemistry journal article supplement (doi:10.1039/d3fo00325f), 2023-01-01
Supplement: d3fo00325f1.pdf [file d3fo00325f1.pdf]

## Supplementary Materials: Associations of serum betaine with blood pressure and hypertension incidence in middle-aged and older adults: a prospective cohort study

Rong-zhu Huang,<sup>a</sup> Jing-fei Ma,<sup>a</sup> Si Chen,<sup>a</sup> Yu-ming Chen,<sup>b,c</sup> Ai-ping Fang,<sup>a,b</sup> Xiao-ting Lu,<sup>a</sup> Zi-hui Huang,<sup>a</sup> Hui-lian Zhu<sup>\*a,b</sup> and Bi-xia Huang<sup>\*a</sup>

**Supplemental Table 1. Baseline characteristics of hypertensive and nonhypertensive participants**

| □ Variables                            | Hypertensive<br>(n=657) | Nonhypertensive<br>(n=1339) | P-value |
|----------------------------------------|-------------------------|-----------------------------|---------|
| Serum betaine, μmol/L                  | 49.9 (39.8-60.8)        | 51.9 (42.5-61.9)            | 0.013   |
| Age, years                             | 58.4 (5.0)              | 56.4 (4.6)                  | <0.001  |
| Women, n (%)                           | 440 (67.0)              | 987 (73.7)                  | 0.002   |
| Education attainment, n (%)            |                         |                             | <0.001  |
| ≤9 years                               | 221 (33.6)              | 346 (25.8)                  |         |
| 9-12 years                             | 273 (41.6)              | 687 (51.3)                  |         |
| ≥12 years                              | 163 (24.8)              | 306 (22.9)                  |         |
| Household income, n (%)                |                         |                             | 0.237   |
| ≤1500 Yuan/Month/Person                | 211 (32.1)              | 475 (35.5)                  |         |
| 1501-3000 Yuan/Month/Person            | 312 (47.5)              | 623 (46.5)                  |         |
| >3000 Yuan/Month/Person                | 134 (20.4)              | 241 (18.0)                  |         |
| Smoker, n (%)                          | 98 (14.9)               | 179 (13.4)                  | 0.384   |
| Alcohol drinker, n (%)                 | 40 (6.1)                | 66 (4.9)                    | 0.328   |
| Total energy intake, kcal/d            | 1813 (512)              | 1810 (492)                  | 0.905   |
| Chinese Healthy Eating Index           | 71.1 (7.6)              | 71.4 (8.1)                  | 0.323   |
| Physical activity, MET-h/d             | 42.8 (16.1)             | 43.0 (15.8)                 | 0.836   |
| Waist circumference, cm                | 85.1 (8.5)              | 81.0 (8.6)                  | <0.001  |
| Serum metabolites                      |                         |                             |         |
| TG, mmol/L                             | 1.45 (1.04-2.07)        | 1.20 (0.85-1.71)            | <0.001  |
| TC, mmol/L                             | 5.48 (1.01)             | 5.42 (1.05)                 | 0.302   |
| HDL-C, mmol/L                          | 1.31 (0.31)             | 1.41 (0.33)                 | <0.001  |
| LDL-C, mmol/L                          | 3.69 (0.89)             | 3.60 (0.89)                 | 0.025   |
| Choline, μmol/L                        | 20.1 (14.8-26.2)        | 18.9 (13.8-25.3)            | 0.023   |
| Homocysteine, μmol/L                   | 13.5 (11.6-17.3)        | 12.8 (11.0-16.0)            | <0.001  |
| Abdominal obesity, n (%)               | 282 (42.9)              | 372 (27.8)                  | <0.001  |
| Prediabetes or diabetes, n (%)         | 90 (13.7)               | 73 (5.5)                    | <0.001  |
| Antihypertension medication use, n (%) | 311 (47.3)              | 0 (0.0)                     | <0.001  |
| SBP, mmHg                              | 139.5 (15.8)            | 115.4 (11.3)                | <0.001  |
| DBP, mmHg                              | 85.9 (10.0)             | 73.4 (7.5)                  | <0.001  |
| Pulse pressure, mmHg                   | 53.6 (13.2)             | 42.0 (8.4)                  | <0.001  |

Data were presented as mean (standard deviation) or median (interquartile range) for continuous variables; and frequency (percentage) for categorical variables.

Abbreviations: MET, metabolic equivalent of task; TG, triglycerides; TC, total cholesterol; HDL-C, high-density lipoprotein cholesterol; LDL-C, low-density lipoprotein cholesterol; SBP, systolic blood pressure; DBP, diastolic blood pressure.

**Supplemental Table 2. Stratified HRs and 95% CIs for incident hypertension according to baseline serum betaine levels (quartiles)**

| □                              | N    | Sex-Specific Quartiles of Serum Betaine Levels |                   |                   |                   | P-interaction <sup>a</sup> |
|--------------------------------|------|------------------------------------------------|-------------------|-------------------|-------------------|----------------------------|
|                                |      | Q1                                             | Q2                | Q3                | Q4                |                            |
| <b>Age, years</b>              |      |                                                |                   |                   |                   | 0.999                      |
| ≤55.5                          | 669  | Ref.                                           | 0.84 (0.53, 1.33) | 0.78 (0.49, 1.25) | 1.01 (0.65, 1.56) |                            |
| >55.5                          | 670  | Ref.                                           | 0.83 (0.58, 1.20) | 0.75 (0.51, 1.08) | 0.93 (0.64, 1.36) |                            |
| <b>Sex</b>                     |      |                                                |                   |                   |                   | 0.873                      |
| men                            | 352  | Ref.                                           | 0.79 (0.48, 1.30) | 0.84 (0.51, 1.38) | 1.05 (0.63, 1.75) |                            |
| women                          | 987  | Ref.                                           | 0.78 (0.55, 1.11) | 0.72 (0.50, 1.03) | 0.86 (0.61, 1.22) |                            |
| <b>Smoker</b>                  |      |                                                |                   |                   |                   | 0.359                      |
| no                             | 1160 | Ref.                                           | 0.80 (0.59, 1.09) | 0.74 (0.54, 1.02) | 0.84 (0.62, 1.15) |                            |
| yes                            | 179  | Ref.                                           | 0.74 (0.34, 1.61) | 0.79 (0.36, 1.74) | 1.51 (0.70, 3.26) |                            |
| <b>Alcohol drinker</b>         |      |                                                |                   |                   |                   | 0.791                      |
| no                             | 1273 | Ref.                                           | 0.82 (0.61, 1.10) | 0.75 (0.56, 1.01) | 0.94 (0.70, 1.26) |                            |
| yes                            | 66   | Ref.                                           | 0.30 (0.05, 1.76) | 0.65 (0.15, 2.84) | 0.40 (0.08, 1.98) |                            |
| <b>CHEI</b>                    |      |                                                |                   |                   |                   | 0.772                      |
| ≤72.0                          | 670  | Ref.                                           | 0.74 (0.48, 1.12) | 0.82 (0.55, 1.23) | 0.98 (0.66, 1.48) |                            |
| >72.0                          | 669  | Ref.                                           | 0.83 (0.56, 1.22) | 0.68 (0.45, 1.03) | 0.90 (0.60, 1.35) |                            |
| <b>Abdominal obesity</b>       |      |                                                |                   |                   |                   | 0.217                      |
| no                             | 967  | Ref.                                           | 0.76 (0.53, 1.09) | 0.61 (0.42, 0.90) | 0.78 (0.55, 1.12) |                            |
| yes                            | 372  | Ref.                                           | 0.85 (0.53, 1.37) | 1.01 (0.64, 1.59) | 1.22 (0.76, 1.96) |                            |
| <b>TG, mmol/L</b>              |      |                                                |                   |                   |                   | 0.244                      |
| <1.7                           | 996  | Ref.                                           | 0.66 (0.46, 0.95) | 0.75 (0.53, 1.07) | 0.91 (0.65, 1.30) |                            |
| ≥1.7                           | 343  | Ref.                                           | 1.12 (0.70, 1.78) | 0.76 (0.45, 1.31) | 0.94 (0.56, 1.58) |                            |
| <b>HDL-C, mmol/L</b>           |      |                                                |                   |                   |                   | 0.557                      |
| <1.0                           | 115  | Ref.                                           | 0.65 (0.23, 1.87) | 0.24 (0.09, 0.65) | 2.07 (0.73, 5.82) |                            |
| ≥1.0                           | 1224 | Ref.                                           | 0.82 (0.61, 1.11) | 0.78 (0.57, 1.06) | 0.92 (0.68, 1.25) |                            |
| <b>Prediabetes or diabetes</b> |      |                                                |                   |                   |                   | 0.306                      |
| no                             | 1266 | Ref.                                           | 0.84 (0.63, 1.13) | 0.80 (0.59, 1.08) | 0.95 (0.70, 1.28) |                            |
| yes                            | 73   | Ref.                                           | 0.19 (0.04, 0.81) | 0.20 (0.05, 0.86) | 0.56 (0.13, 2.35) |                            |
| <b>Serum choline, μmol/L</b>   |      |                                                |                   |                   |                   | 0.173                      |
| ≤18.9                          | 670  | Ref.                                           | 0.95 (0.64, 1.42) | 0.93 (0.62, 1.37) | 0.83 (0.54, 1.27) |                            |
| >18.9                          | 669  | Ref.                                           | 0.67 (0.45, 1.01) | 0.59 (0.38, 0.92) | 0.99 (0.67, 1.46) |                            |

<sup>a</sup> Interactions between serum betaine and covariates were tested by the likelihood ratio test using the multiplicative interaction term. In the multivariable-adjusted model, confounding factors including age, education attainment, household income, smoker, alcohol drinker, energy intake, CHEI, physical activity, WC, TG, HDL-C, prediabetes or diabetes (yes or no), and serum choline. The medians of age, CHEI, and serum choline were cut-off points.
